# Supplementary material for: Immune Cell–Poor Melanomas Benefit from PD-1 Blockade after Targeted Type I IFN Activation
Source: Oxford University Press journal article supplement (doi:10.1158/2159-8290.cd-13-0458), 2014-03-03
Supplement: 21598290cd130458-sup-supp_table_1.xls [file 21598290cd130458-sup-supp_table_1.xls]

## Sheet: SupplTable1
Supplementary Table 1
List of top 50 interferon alpha induced gene across five humane melanoma cell lines.
Data were retrieved from the publicly available dataset GSE19428
AffyID	Symbol		AffyID	Symbol		AffyID	Symbol
200986_at	SERPING1		205620_at	F10		214022_s_at	IFITM1
201641_at	BST2		205636_at	SH3GL3		214059_at	IFI44
202086_at	MX1		205660_at	OASL		214584_x_at	ACACB
202270_at	GBP1		205801_s_at	RASGRP3		217502_at	IFIT2
202411_at	IFI27		206133_at	XAF1		218400_at	OAS3
202869_at	OAS1		206463_s_at	DHRS2		218543_s_at	PARP12
203153_at	IFIT1		207757_at	ZFP2		218943_s_at	DDX58
203236_s_at	LGALS9		207850_at	CXCL3		218986_s_at	DDX60
204415_at	IFI6		208392_x_at	SP110		219209_at	IFIH1
204439_at	IFI44L		208436_s_at	IRF7		219211_at	USP18
204470_at	CXCL1		208467_at	KLF12		219352_at	HERC6
204502_at	SAMHD1		209774_x_at	CXCL2		219364_at	DHX58
204602_at	DKK1		209969_s_at	STAT1		219593_at	SLC15A3
204698_at	ISG20		210538_s_at	BIRC3		219691_at	SAMD9
204747_at	IFIT3		211799_x_at	HLA-C		219863_at	HERC5
204972_at	OAS2		213293_s_at	TRIM22		220323_at	CNTD2
205483_s_at	ISG15		213797_at	RSAD2
